# Supplementary material
Source: ML conference proceedings conference paper supplement (https://openreview.net/forum?id=yXW2dCTQdi)

**(a)**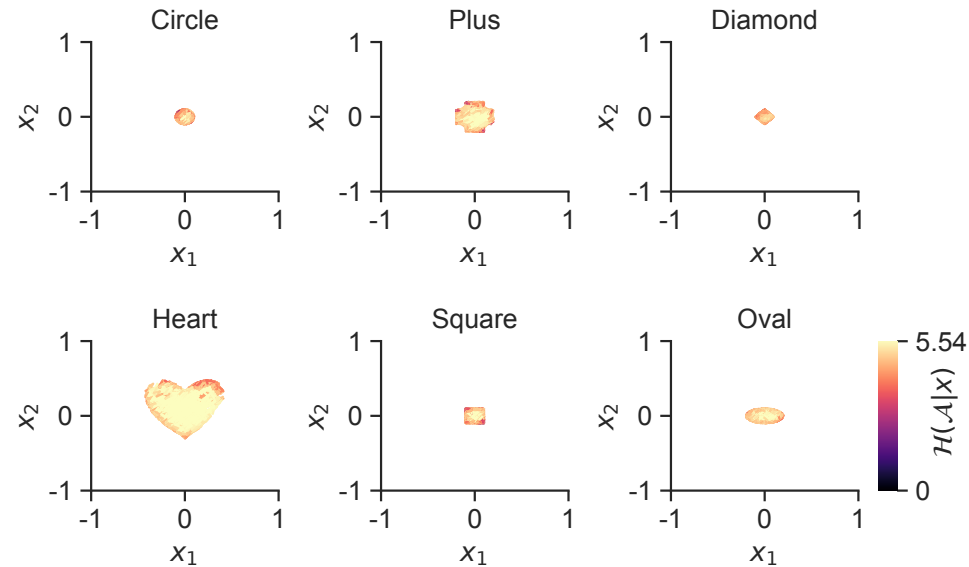**(b)**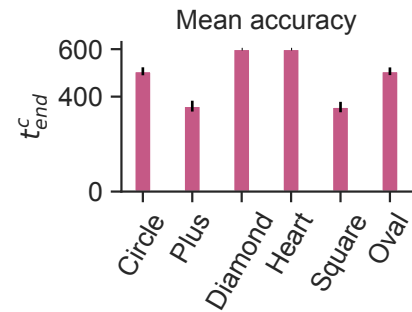**(c)**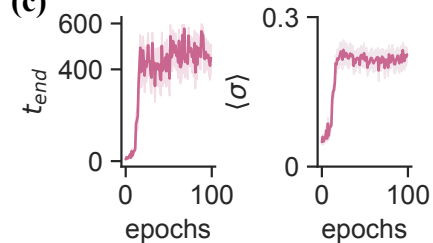

Supplement: supplementary_material [file attachment]

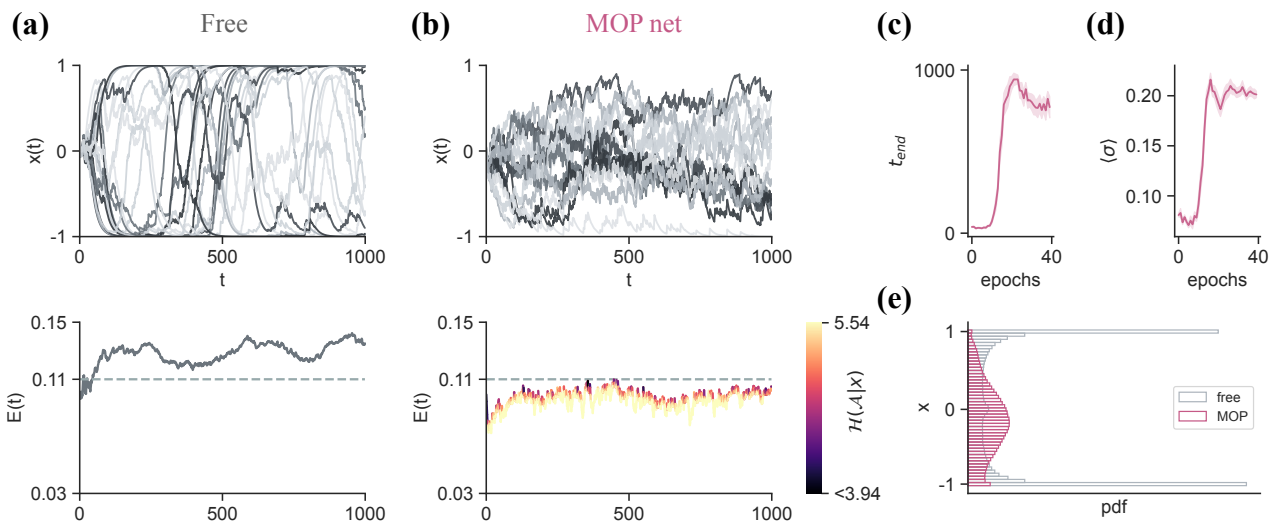

Supplement: supplementary_material [file attachment]

**(a)**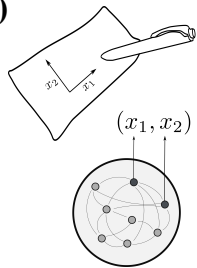**(b)**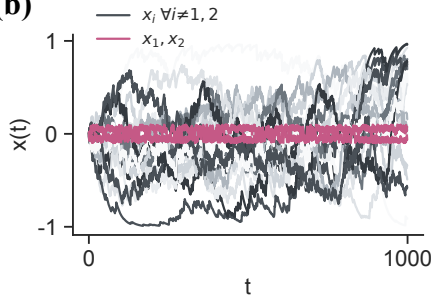**(c)**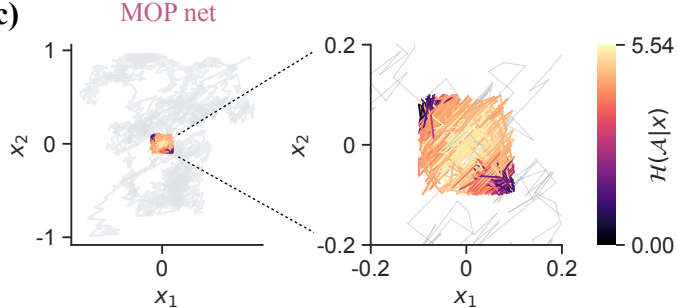**(d)**

R net

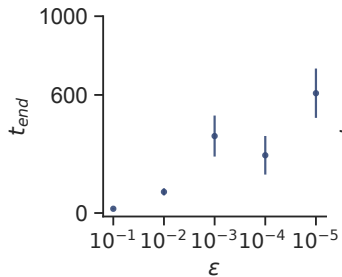**(e)**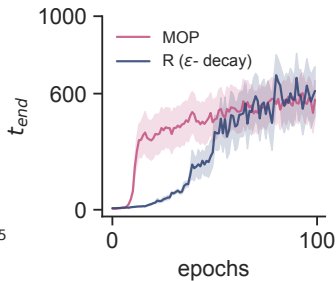**(f)**

R net

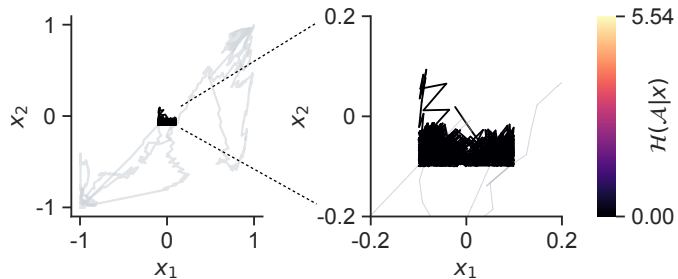

Supplement: supplementary_material [file attachment]

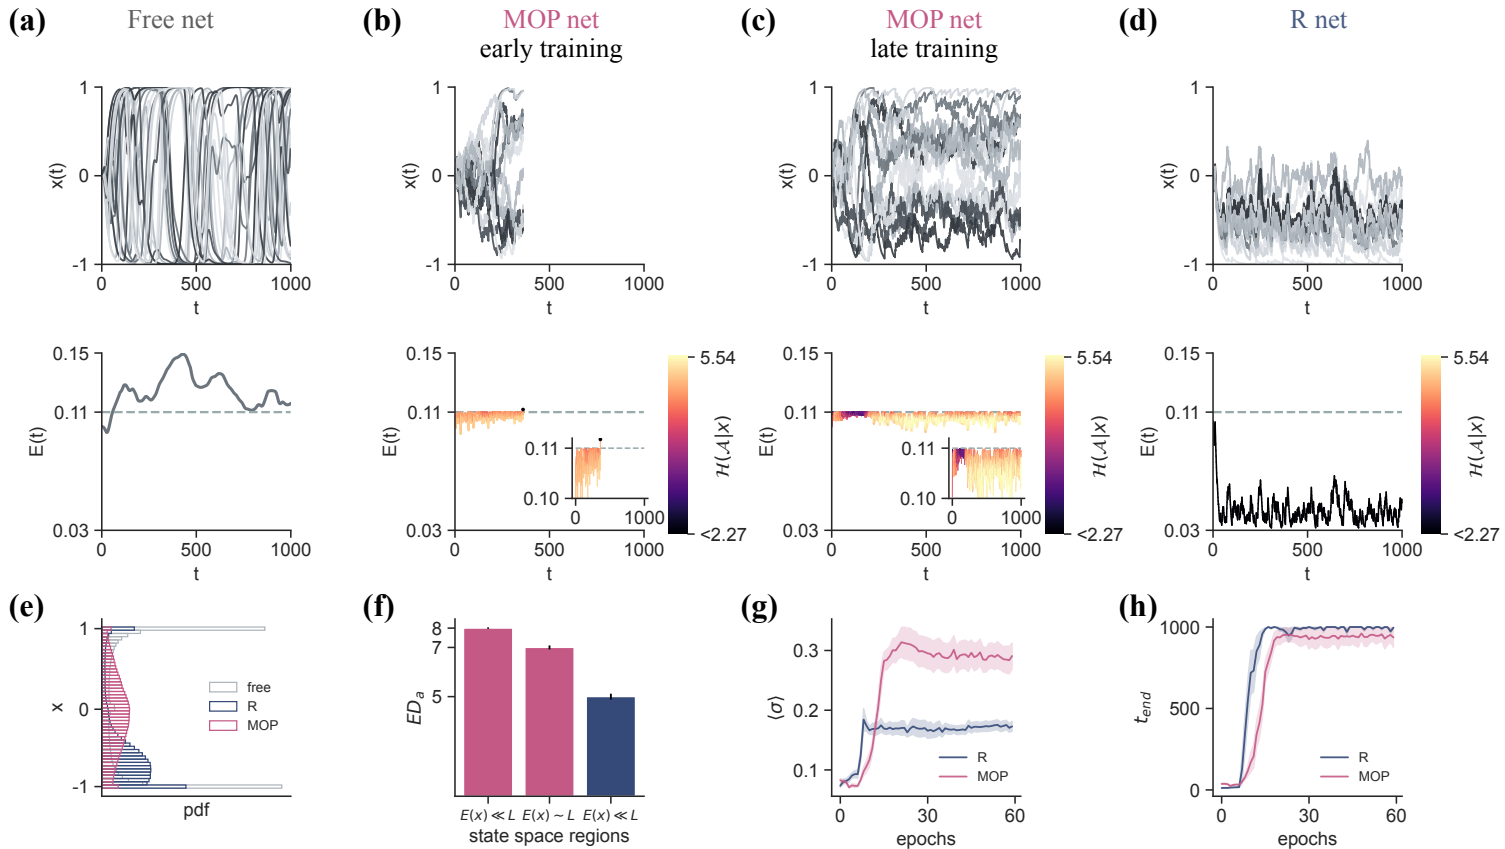

Supplement: supplementary_material [file attachment]

**(a)**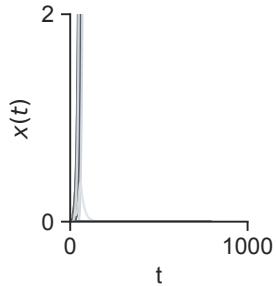**(b)**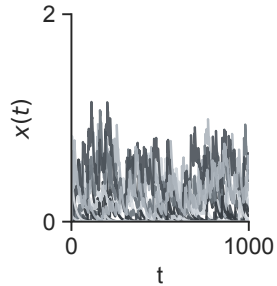**(c)**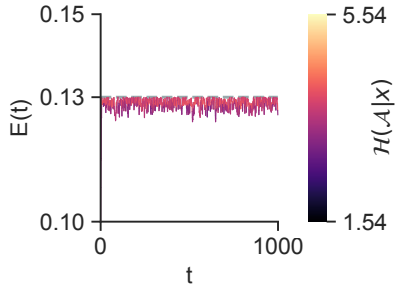**(d)**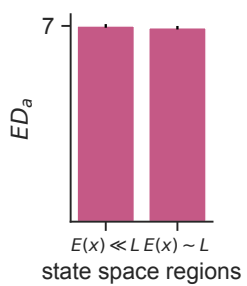**(e)**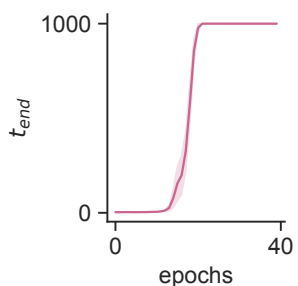

Supplement: supplementary_material [file attachment]

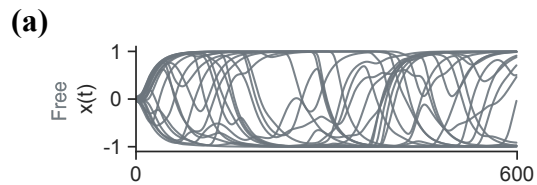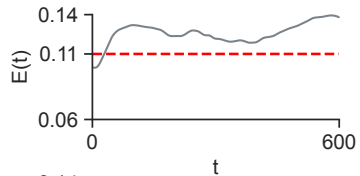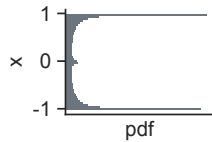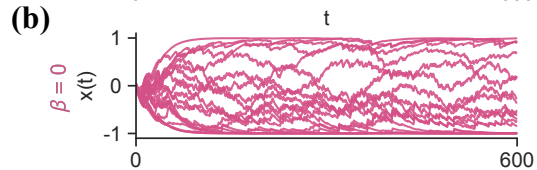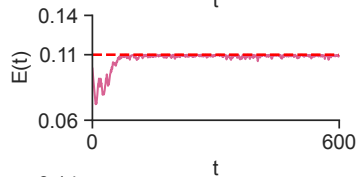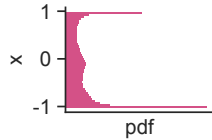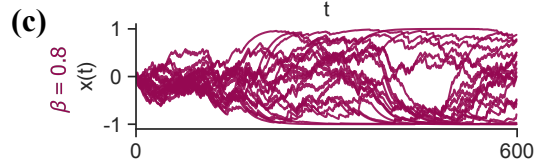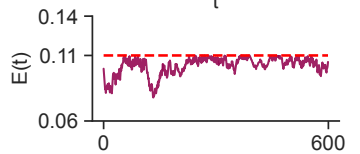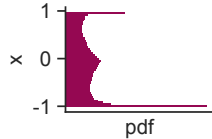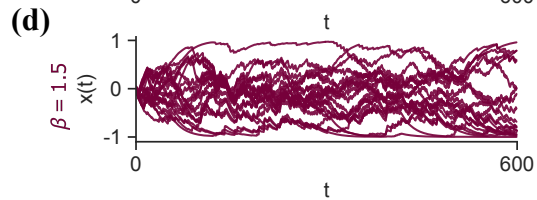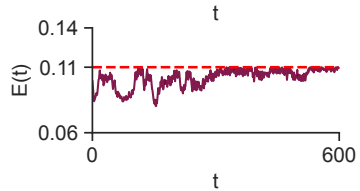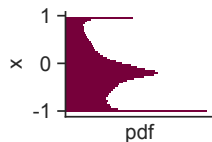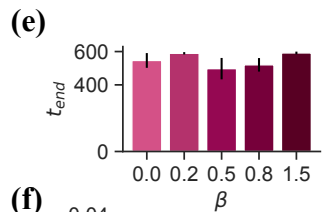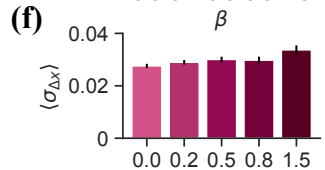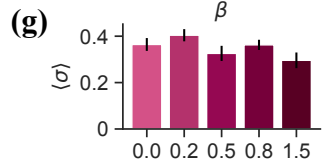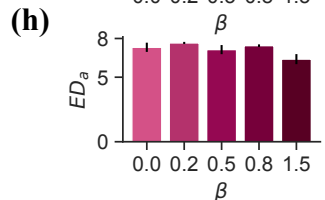

Supplement: supplementary_material [file attachment]
